# Supplementary material for: Sedimentology and ichnology of the Mafube dinosaur track site (Lower Jurassic, eastern Free State, South Africa): a report on footprint preservation and palaeoenvironment
Source: PeerJ journal article supplement (doi:10.7717/peerj.2285), 2016-08-23
Supplement: Table_S1_Mafube_track_measurements.pdf [file Table_S1_Mafube_track_measurements.pdf]

Table S1. Additional anatomical measurements of Mafube tracks relating to the size differential between morphotypes A and B at the Mafube dinosaur track site. See Figure 2B for how the interdigit (i.e., divarication) angle, length (t), width (w), length of rear of phalangeal part of foot (r) have been measured in this study (cf. Olsen et al. 1998). All distance measurements are in centimetres; angles are in degrees. N/A: Measurements could not be determined due to e.g., absence of digit impressions; absence of heel impression; presence of the natural cast obscuring the footprint.

| Track # | Length | Width | Ratio<br>length:width | r   | Interdigit angle II <sup>IV</sup> | Hypex<br>shape<br>II <sup>III</sup> | Interdigit angle II <sup>III</sup> | Hypex shape III <sup>IV</sup> | Interdigit angle III <sup>IV</sup> |
|---------|--------|-------|-----------------------|-----|-----------------------------------|-------------------------------------|------------------------------------|-------------------------------|------------------------------------|
| 4       | 41     | 31    | 1.3                   | 23  | 46                                | N/A                                 | 23                                 | N/A                           | 23                                 |
| 6       | 33     | 27    | 1.2                   | 23  | 57                                | V-shaped                            | 26                                 | U-shaped                      | 31                                 |
| 9       | 26     | 23    | 1.1                   | 18  | 46                                | N/A                                 | 21                                 | N/A                           | 25                                 |
| 11      | 20     | 21    | 1.0                   | 19  | 54                                | V-shaped                            | 31                                 | V-shaped                      | 23                                 |
| 13      | N/A    | 15    | N/A                   | 8   | 49                                | V-shaped                            | 21                                 | V-shaped                      | 28                                 |
| 19      | 28     | 22    | 1.3                   | 20  | 54                                | V-shaped                            | 25                                 | V-shaped                      | 29                                 |
| 21      | 25     | 20    | 1.3                   | 16  | 52                                | V-shaped                            | 24                                 | V-shaped                      | 28                                 |
| 24      | 21     | 17    | 1.2                   | 10  | 78                                | N/A                                 | 33                                 | N/A                           | 45                                 |
| 25      | 23     | 18    | 1.3                   | 13  | N/A                               | N/A                                 | N/A                                | N/A                           | N/A                                |
| 26      | 25     | 17    | 1.5                   | 20  | 49                                | V-shaped                            | 22                                 | V-shaped                      | 27                                 |
| 30      | 32     | N/A   | N/A                   | N/A | N/A                               | N/A                                 | N/A                                | N/A                           | N/A                                |
| 32      | 30     | 26    | 1.2                   | N/A | N/A                               | N/A                                 | N/A                                | N/A                           | N/A                                |
| 37      | 21     | 15    | 1.4                   | 15  | 42                                | N/A                                 | 19                                 | N/A                           | 23                                 |
| 38      | 29     | 15    | 1.9                   | 14  | 58                                | N/A                                 | 30                                 | N/A                           | 28                                 |
| 39      | 24     | 17    | 1.4                   | 21  | N/A                               | N/A                                 | N/A                                | N/A                           | N/A                                |
| 41      | 20     | 16    | 1.3                   | 16  | N/A                               | V-shaped                            | N/A                                | N/A                           | N/A                                |
| 47      | 13     | 13    | 1.0                   | 11  | N/A                               | N/A                                 | N/A                                | N/A                           | N/A                                |
| 51      | N/A    | 18    | N/A                   | N/A | N/A                               | V-shaped                            | N/A                                | V-shaped                      | N/A                                |
